# Supplementary material for: CB1R regulates soluble leptin receptor levels via CHOP, contributing to hepatic leptin resistance
Source: eLife journal article supplement (doi:10.7554/elife.60771), 2020-11-19
Supplement: supp [file elife-60771-supp-v1.zip]

Archive with 20 entries (20 files):
- elife_poa_e60771_Figure_1_figure_supplement_1.tif
- elife_poa_e60771_Figure_2_figure_supplement_1.tif
- elife_poa_e60771_Figure_3_figure_supplement_1.tif
- elife_poa_e60771_Figure_3_figure_supplement_2.tif
- elife_poa_e60771_Figure_6_figure_supplement_1.tif
- elife_poa_e60771_Figure_6_figure_supplement_2.tif
- elife_poa_e60771_Supplementary_file_1.docx
- elife_poa_e60771_Transparent_Reporting_File.pdf
- elife_poa_e60771_Figure_1_source_data_1.xlsx
- elife_poa_e60771_Figure_2_source_data_1.xlsx
- elife_poa_e60771_Figure_3_source_data_1.xlsx
- elife_poa_e60771_Figure_4_source_data_1.xlsx
- elife_poa_e60771_Figure_5_source_data_1.xlsx
- elife_poa_e60771_Figure_6_source_data_1.xlsx
- elife_poa_e60771_Figure_1_figure_supplement_1_source_data_1.xlsx
- elife_poa_e60771_Figure_2_figure_supplement_1_source_data_1.xlsx
- elife_poa_e60771_Figure_3_figure_supplement_1_source_data_1.xlsx
- elife_poa_e60771_Figure_3_figure_supplement_2_source_data_1.xlsx
- elife_poa_e60771_Figure_6_figure_supplement_1_source_data_1.xlsx
- elife_poa_e60771_Figure_6_figure_supplement_2_source_data_1.xlsx
