# Supplementary material for: CB1R regulates soluble leptin receptor levels via CHOP, contributing to hepatic leptin resistance
Source: eLife journal article supplement (doi:10.7554/elife.60771), 2020-11-19
Supplement: supp [file elife-60771-supp-v1.zip › elife_poa_e60771_Figure_1_figure_supplement_1_source_data_1.xlsx]

## Sheet: Figure 1 - Figure Supplement 1B
Cont.	AAV-LEPR	Cont.	AAV-LEPR	Cont.	AAV-LEPR
1	1.67161	1	1.40967	1	1.24202
1.04343	2.14612	0.816079	1.70738	1.04692	1.49141
1.37281	2.32425	0.829266	1.84366	1.14151	1.5024
