# Supplementary material for: CB1R regulates soluble leptin receptor levels via CHOP, contributing to hepatic leptin resistance
Source: eLife journal article supplement (doi:10.7554/elife.60771), 2020-11-19
Supplement: supp [file elife-60771-supp-v1.zip › elife_poa_e60771_Figure_1_source_data_1.xlsx]

## Sheet: Figure 1A
STD	HFD	HFD +JD5037	STD	HFD
3.25	2.887	2.081	2.7	2.027
3.646	2.058	1.592	3.368	1.918
4.114	1.905	1.603	3.761	2.508
2.129	1.495	2.44	2.411	3.524
3.595	0.955	2.71	3.356	2.812
3.442	0.975	2.826	3.129	4.337
2.742	1.367	2.393	3.704	2.435
3.624	1.638	2.679	4.734
3.234	1.563	1.622	4.497
3.926	1.317	1.799	3.559
3.063	1.965	5.693
3.553	1.525
2.814	2.042
4.328	1.453
2.695	0.77
5.031	1.217
2.534	1.322
2.644	1.374
5.121	1.919
1.956	1.618
4.659	1.36

## Sheet: Figure 1B
STD	HFD	HFD +JD5037	STD	HFD
101.125	64.6945	88.0159	57.1345	82.8113
94.985	67.177	106.524	50.7143	62.788
80.3686	57.3856	125.48	118.65	58.489
102.041	28.9685	64.7715	93.0374	59.6279
116.806	11.5617	63.0469	82.4068	72.7308
108.18	12.6332	28.2869	62.0639	67.8445
	27.2233	75.2468
	11.4847	65.5654
		30.0105

## Sheet: Figure 1C
STD	HFD	HFD +JD5037	STD	HFD
1.35806	0.400417	1.03	1.11541	1.32783
0.81712	0.436476	1.5	0.718943	0.952061
1.12173	0.50909	1.24	1.08372	0.867428
0.803351	0.397517		1.15068	0.860441
0.989657	0.433769		0.91	0.17
1.84676	0.481297		0.94	1.69
0.572362	0.74		0.44	1.9
0.955945	1.26		1.06	1.21
1.31	0.75		1.41	1.18
0.91	0.53		1.79	1.31
0.8
1.05

## Sheet: Figure 1E
STD	HFD	HFD +JD5037	STD	HFD	HFD +JD5037	STD	HFD	HFD +JD5037
1	0.575923	0.674154	1	0.951998	1.18582	1	0.731976	0.91203
1.50808	0.517314	0.945447	0.754885	0.889463	1.11695	0.882611	0.596498	0.834636
1.11017	0.334799	1.25097	1.23975	0.714064	1.23545	0.981327	0.396152	0.998469
0.959654	0.353358	0.907555	0.97415	0.614769	1.19202	0.908397	0.766386	0.929824
0.856634	0.057856	0.782044	0.973367	0.608382	1.36339	0.856459	0.717481	0.983926
0.679025		0.448545	0.823881	0.586616	0.704877	1.08455	0.812267	0.759699
		0.711888	1.06058	0.578837	0.772267	0.987039	0.656371	0.853202
		0.770471	1.05031	0.715366	0.617558	0.928405		0.850407
			0.889111	0.57802	0.624368			0.732078
				0.492597

## Sheet: Figure 1F
STD	HFD	STD	HFD
24.4	39.2	34.25	39.4
24.5	44.35	32.4	43.7
24.85	47.6	26	39.8
23.15	40.8	31.2	46.25
24.1		34.3	45.8
25.35		35.8	46.6
24.15		38.8	49.2
24.95		38.9	43.6
23.9		29.9	45.6
22.7		30.5	40.5
32.5		31.2	41.1
33.7		34.1	41
39.5		26.3	39.1
40.9		29.5	43.1
38.7		30.5	41
37		33.3	46.2
33.3			44.7
36.1
30
27.5

## Sheet: Figure 1H
STD	HFD	STD	HFD	STD	HFD
0.518037	0.789642	0.887334	0.815252	1.17308	0.717219
0.670091	0.317382	1.15191	0.872221	0.847437	0.695108
1.50348	0.64892	1.01426	0.817915	0.568009	0.581978
1.30839	1.14908	0.946499	1.20892	1.17569	0.766123
1.35387	1.06968	1.29605	1.42949	1.15569	1.53038
1.18546	1.54264	1.25582	1.31285	0.689936	1.67296
0.588029	1.48863	0.79636	1.39211	0.574504	1.6782
0.59588	1.05172	0.478301	1.3141	1.20842	1.44256
1.27109	1.15047	1.03896	1.23186	1.19575
1.00567	1.59711	1.13451	1.62324

## Sheet: Figure 1J
Veh	Leptin	Veh	Leptin
1.27328	1.6333	0.738818	3.8109
1.08837	1.4051	0.770653	4.76085
0.838203	2.29622	0.534522	4.29389
0.800149		0.99615	3.84648

## Sheet: Figure 1L
Veh	Leptin	Veh	Leptin
0.810852	1.48385	0.450444	1.58219
1.12119	1.34891	0.511395	1.46032
1.04905	0.890852	0.712359	1.18345
1.01891	1.19867		1.13048

## Sheet: Figure 1M
STD	HFD
26.7	26.8
27.75	27.15
27.6	34.4
29

## Sheet: Figure 1N
STD	HFD
1.424	1.089
2.662	1.481
2.175	0.847
1.804	0.848

[truncated: 3 more sheets: Figure 1O, Figure 1Q, Figure 1S]
