# Supplementary material for: CB1R regulates soluble leptin receptor levels via CHOP, contributing to hepatic leptin resistance
Source: eLife journal article supplement (doi:10.7554/elife.60771), 2020-11-19
Supplement: supp [file elife-60771-supp-v1.zip › elife_poa_e60771_Figure_2_source_data_1.xlsx]

## Sheet: Figure 2B
Veh	NE	NE+ JD5037
0.7638	0.4987	1.88797
1.0552	0.8497	1.12773
1.181	0.209921	3.81697
1	0.759644	4.72737
0.93026	0.730784	2.93254
1.16223	0.937749	3.13696
1.03897	0.688958	0.710466
1	0.550674	0.688156
0.810723	0.602203	0.725231
0.717659	0.646055	1.00079
1.02507	0.298228	0.543381
1.84592	0.456744	0.718098
1.40383	0.429468

## Sheet: Figure 2C
Veh	NE	NE+ JD5037
1.18	0.41	0.73
0.99	0.13	1.15
1.52	0.31	0.59
1.38	0.31	1.34
0.37	1.16	2.09
1.1	0.73	1.31
1.05	1.18	1.02
1.27	0.8	0.4
1.17	0.679086	2.56
1	0.737987	1.16
0.64	0.940609	1.12
0.36	1.18646	1.36
0.914888	0.525465
1.11858	0.577009
1.23257
1.35347
0.824543

## Sheet: Figure 2E
Veh	NE	NE+ JD5037	Veh	NE	NE+ JD5037	Veh	NE	NE+ JD5037
1.65692	0.454895	0.457829	1.46573	0.560104	0.956177	1.76816	0.681362	0.896599
0.965747	0.477565	0.571237	0.841165	0.548783	1.00748	0.62308	0.874844	1.60763
0.676402	0.752827	0.602153	0.832901	0.767382	0.919586	0.552817	0.955892	1.65849
0.700932	0.613121	0.7947	0.860203	0.73997	1.06031	1.05595		2.07908
