# Supplementary material for: CB1R regulates soluble leptin receptor levels via CHOP, contributing to hepatic leptin resistance
Source: eLife journal article supplement (doi:10.7554/elife.60771), 2020-11-19
Supplement: supp [file elife-60771-supp-v1.zip › elife_poa_e60771_Figure_3_figure_supplement_1_source_data_1.xlsx]

## Sheet: Figure 3 - Figure Supplement 1B
STD	HFD	HFD +JD5037
1.17698	1.217	0.893323
1.22367	1.35356	1.13621
1.09468	2.30485	1.15293
1.02337	1.19444	1.21899
0.75179	1.63316	1.00816
0.72951

## Sheet: Figure 3 - Figure Supplement 1D
STD	HFD
0.950466	1.19486
0.92949	1.04516
1.1162	0.685424
1.00384	0.583678
