# Supplementary material for: CB1R regulates soluble leptin receptor levels via CHOP, contributing to hepatic leptin resistance
Source: eLife journal article supplement (doi:10.7554/elife.60771), 2020-11-19
Supplement: supp [file elife-60771-supp-v1.zip › elife_poa_e60771_Figure_3_source_data_1.xlsx]

## Sheet: Figure 3A
STD	HFD	HFD +JD5037	STD	HFD
0.555747	0.679479	2.06	0.788673	1.01924
0.912249	0.555747	1.03706	0.536816	1.10382
0.780516	0.688964	1.16272	0.577343	1.26357
0.925786	0.379915	1.96905	0.514948	0.417906
1.05245	0.615039	1.68471	0.812956	0.514503
0.922583	0.630142		0.582872	0.545726
1.11246	0.914624		0.790726	0.496977
0.83292	0.59306		0.618245	1.93522
0.78799	0.61185		1.03	1.78695
1.32984	0.705271		2.07	2.14726
1.14572	0.357868		1.71	2.55354
0.833642	0.428539		2.61	1.64433
1.55563	0.101356		1.74	2.05979
0.947698	0.312624		0.83	1.29
0.854114	0.320301		1.09	1.48
0.631783			0.59
1.50786			1.12
			1.34
			1.24

## Sheet: Figure 3C
STD	HFD	HFD +JD5037	STD	HFD
0.907355	0.276611	1.83127	1.32857	1.83524
0.694146	0.609533	3.15137	1.39138	1.61188
0.817403	0.522845	3.51793	3.04629	1.70025
1.11855	0.350502	3.35789	2.13162	2.66371
2.04102		4.03583	1.28011	1.51231
				0.584519

## Sheet: Figure 3E
STD	HFD	HFD +JD5037	STD	HFD	HFD +JD5037
32.7	48	35.6	31	46.6	40.6
31.5	34	29.7	37	44	39.8
32.1	40	35.8	34	49	41.9
29.2	46.3	38	31	44	42
25.2	42	30.4	32	44	38.8
29.1	35.9	34.6	29	40	43.6
31.9	47	32.5	28	44.1	34
31.4	50.4	37.5	28.6	40.7	37.8
33.9	47.4	30	28.2	35.7	33.3
32.5	43.5	39	28	51	34.7
31.6		41	29	46.2	39.8
		37.3	28.4	33	35.6
		34	32.4	48.1
		36.5	32.1	45.1
		31.1	30.1	48
		33.9	28.5	40.8
		35.2	28.8	44.2
		34.6		45.5
		35.6		42.7
		36.4		46.5
		40.8
		37.8
		33.8

## Sheet: Figure 3F
STD	HFD	HFD +JD5037	STD	HFD	HFD +JD5037
13.5031	36.2953	27.1231	20.7838	40.0909	35.3571
12.5	39.8495	25.9928	21.1323	37.75	31.7899
15.6958	36.3398	22.089	11.7903	40.0568	35.8115
9.58453	41.0053	19.2031	17.875	35.6023	33.3691
12.0054	33.6141	34.7803	17.1207	38.35	33.7113
16.1825		29.8669	11.9821	36.2925	33.8417
7.09047		32.9261	15.2914	36.7322	29.8677
7.45921		25.3618	14.2908	37.367	35.0926
17.5085		28.0745	16.1794	37.1176	25.7493
18.5395			16.1364	34.9849	32.4775
			14.6181	32.0563	32.823
			17.9385	37.4693	26.3442
			16.7987	37.4449
			20.6018	38.7681
			13.4068	41.6063
			17.039	42.7451
				39.1538
				36.9321
				38.3871

## Sheet: Figure 3G
STD	HFD	HFD +JD5037	STD	HFD	HFD +JD5037
81.9907	59.9482	54.1854	73.1216	58.3409	60.0985
83.2595	57.1875	60.7263	74.3382	59.5	64.0089
80.7929	60	74.6465	83.5161	56.8864	59.463
78.7393	55.0397	55.1044	76.625	60.6932	61.1191
74.4444	62.516	60.2933	78.7586	57.3625	57.4083
68.599		59.9482	82.7321	59.7392	64.8971
70.2445		57.1875	79.662	58.6241	60.7936
67.0979		60	80.1773	58.5574	70.389
77.5424		55.0397	78.3223	69.5303	63.5886
76.9588		62.516	79.3706	58.5606	63.9466
		61.5617	80.7292	59.8361	69.3216
		65.0444	77.7692	59.3943
		63.4375	79.2904	57.8882
		69.6382	75.3704	55.0566
		68.4472	82.2712	58.2308
			79.9113	59.719
				56.9534

## Sheet: Figure 3H
STD	HFD	HFD +JD5037	STD	HFD	HFD +JD5037
107.16	108.54	113.7	99.15	202.05	155.07
131.79	161.19	119.49	113.37	140.97	162.9
88.2	135.66	107.37	117.99	92.31	220.89
114.72	201.18	173.46	113.61	245.61	166.02
114.3	95.46	191.67	110.85	233.49	86.43
129.93	195.72	122.1	112.53	189.09	172.68
146.4	240.48	130.8	120.21	199.17	132.09
123.96	256.92	65.1	109.5	167.82	146.01
130.5	181.5	159.36	90.48	230.67	105.33
129.36	265.68	142.38	122.43	217.08
102.87	160.98	115.38	125.37	198.57
90.54	159.09	172.38	102.33	257.22
94.02	174.87	162.36	126.6	159.48
91.8	153.3	118.44	108.9	203.07
115.08	174.87	155.61	93.63	176.55
106.53	256.98	117.45	51.75	116.73
116.94	234.78	166.11	62.16	159.75
103.23	247.32	139.74		92.37
113.85	222.87	143.73		117.03
123.6	223.71	104.25		90.42
132.21
109.44
95.4
103.47
92.25
89.94

## Sheet: Figure 3I
STD	HFD	HFD +JD5037	STD	HFD	HFD +JD5037
0.39	0.99	1.08	0.27	1.41	1.62
0.42	1.53	0.78	0.33	0.75	1.32
0.21	1.77	0.6	0.36	0.51	1.8
0.18	0.96	0.9	0.33	1.47	0.84
0.39	1.74	1.26	0.45	1.41	1.14
0.33	1.8	1.08	0.36	0.87	1.41
0.54	1.88	1.17	0.42	0.99	0.84
0.63	1.44	0.897	0.33	0.78	0.96
0.6	0.88	1.05	0.45	1.17	1.26
0.48	1.36	0.93	0.42	1.32
0.51		0.78	0.6	0.93
0.33		0.81		1.89
0.24		0.87		1.5
0.27		0.69		2.04
0.21		0.99
0.18

## Sheet: Figure 3J
STD	HFD	HFD +JD5037	STD	HFD	HFD +JD5037
20.2959	240.553	185.924	35.3968	366.401	204.589
19.1984	168.473	186.839	11.753	341.403	292.281
12.665	223.143	206.965	41.7626	169.731	273.489
27.0384	85.6459	90.3451	37.2912	173.428	269.838
9.64758	125.277	15.4807	31.7095	34.7507	171.241
51.4081	130.734	60.9165	39.1293	127.387	215.655
37.8494	60.784	73.556	25.1909	159.547	83.9181
30.5863	100.061	221.5	14.2282	189.405	110.939
5.03307	69.5938	65.9162	15.0519	104.685	212.972
63.683		7.68321	13.2603	226.598	224.019
45.4854		2.8066		329.631	83.8018
18.3901		4.8118		131.041
17.5477		4.4734
16.0591		5.2965
19.5052
