# Supplementary material for: CB1R regulates soluble leptin receptor levels via CHOP, contributing to hepatic leptin resistance
Source: eLife journal article supplement (doi:10.7554/elife.60771), 2020-11-19
Supplement: supp [file elife-60771-supp-v1.zip › elife_poa_e60771_Figure_4_source_data_1.xlsx]

## Sheet: Figure 4A
STD	HFD	HFD +JD5037	STD	HFD	HFD +JD5037
2.534	1.374	2.393	3.696	2.052	2.324
2.644	1.919	2.679	4.267	1.39	1.951
5.121	1.618	1.622	3.562	1.303	2.35
1.956	1.36	5.693	4.282	1.387	2.624
4.659	2.58	3.045	5.092	2.438	2.44
4.495	3.015	4.45	4.535	1.634	2.564
3.21	0.32	4.76	4.658	1.598	1.897
5.64	2.065	3.18	4.338	2.453	2.14
3.515	2.81	4.157	4.407	2.453	1.853
4.195	2.28	2.408	2.79	3.036	1.382
4.285	1.445	2.257	2.841	1.72	1.245
4.485	1.304	2.65	3.388	1.069
	1.926		3.413	1.322
	1.842		3.718	1.199
	1.899		4.126	2.287
			4.131	1.354
				1.225
				2.009

## Sheet: Figure 4B
STD	HFD	HFD +JD5037	STD	HFD	HFD +JD5037
101.125	64.6945	88.0159	83.8519	17.5347	25.5931
94.985	67.177	106.524	10.3953	97.9684	27.2253
80.3686	57.3856	125.48	36.5912	70.1864	80.6657
102.041	28.9685	64.7715	61.5464	43.0508	66.3092
116.806	11.5617	63.0469	40.2852	6.33613	20.5911
108.18	12.6332	75.2468		17.498	41.3395
	27.2233	65.5654		8.43182	61.7941
	11.4847	30.0105

## Sheet: Figure 4C
STD	HFD	HFD +JD5037	STD	HFD	HFD +JD5037
1.045	0.427946	0.606467	0.85	0.34	0.2
1.03491	0.624382	1.03922	0.25	0.45	0.28
1.28565	0.260165	1.67191	0.43	0.67	0.52
0.949671	0.461211	0.563114	0.67	0.48	0.714
1.21293	0.680893	1.92186	0.66	0.37	0.329
0.624382	0.12154	1.73	0.43	0.79	0.963
0.76	0.65	0.77	0.34	0.35	0.362
1.23	0.98	1.08	0.26	0.36	0.633
0.96	0.65	0.47	0.31	0.45	0.771
	1.3	2.13	0.463	1.087
		1.25	0.88	0.76
		0.71	0.626	0.787
			0.54	0.481
			0.695	0.291
			1.032	1.161
				1.129
				0.655
				0.85

## Sheet: Figure 4E
STD	HFD	HFD +JD5037	STD	HFD	HFD +JD5037	STD	HFD	HFD +JD5037
0.925593	0.628739	1.12732	0.521173	1.06101	1.25716	0.70359	0.977483	1.36392
1.10386	0.53568	0.901902	0.860871	0.84869	0.875678	0.972474	0.511898	1.13962
1.10624	0.834016	0.906293	1.08854	0.654675	1.05814	1.07837	0.684719	1.086
1.01415	0.948207	0.479473	1.11688	1.70852	1.20724	0.738683	1.44054	0.774048
0.834112	1.49225	1.06344	0.978715	1.53759	2.22735	1.10892	2.0804	1.59311
1.01603	1.44732		1.43382	1.70298		1.39796	1.78986

## Sheet: Figure 4F
STD	HFD	HFD +JD5037	STD	HFD	HFD +JD5037
25.728	42.167	5.602	3.668	68.297	46.453
11.993	34.528	35.016	5.33	48.635	32.783
13.352	24.919	32.557	4.881	19.74	40.652
5.794	55.77	38.058	11.833	58.181	37.76
8.946	59.528	6.352	13.893	73.384	21.169
1.613	21.818	17.861	6.518	58.33	20.215
4.23	85.976	27.771	9.81	83.21	34.011
12.053	85.332	9.81	6.167	90.225	37.921
4.055	80.212	13.494	5.022	75.547
2.205	31.381	35.289	6.533	73.158
10.486	76.539	12.492	8.466	75.616
11.231	64.682	24.851		98.196
13.516	92.418	7.652		56.207
12.861				33.422
17.094
13.052
3.188
17.355

## Sheet: Figure 4H
Veh	Leptin
0.664546	1.21576
0.833609	1.07559
0.61036	1.04214
1.17776	0.885792
1.71372	0.493784
