# Supplementary material for: CB1R regulates soluble leptin receptor levels via CHOP, contributing to hepatic leptin resistance
Source: eLife journal article supplement (doi:10.7554/elife.60771), 2020-11-19
Supplement: supp [file elife-60771-supp-v1.zip › elife_poa_e60771_Figure_5_source_data_1.xlsx]

## Sheet: Figure 5A
Veh	NE	Veh	NE
1.1	0.76	0	0
0.91	0.76
1.09	0.88
0.93	0.58
1.2	0.69
0.94	0.61
0.86	0.89
1.02	0.89
1.02811	0.94
0.926588	0.809442
1.1487	0.592546
0.803851	0.965936
1.13682	0.823591
1.17	0.35233
1.06	0.81
0.85	0.82
1.04	0.76
0.93	0.97
0.98	0.81
	0.76

## Sheet: Figure 5B
Veh	NE	Veh	NE
1.12	0.71	0.63	0.13
0.9	0.92	0.26	0.29
0.77	0.78	0.21	0.12
0.82	0.81	0.75	1.56
1.34	0.63	0.69	0.2
1.6	0.4	0.54	0.48
0.86	0.68	0.077913	0.33
0.86	0.68	0.051582	0.5
0.713507	0.9	0.099649	0.63
0.805524	0.85441	0.076309	0.214344
1.2861	0.93174	0.124827	0.213602
1.29056	0.788947	0.140437	0.129677
1.04826	0.652025		0.166431
	1.2466		0.149996
			0.156366

## Sheet: Figure 5C
Veh	NE	Veh	NE
1.39	0.49	0.813191	0.403787
1.77	0.33	0.579013	0.66281
0.41	0.47	0.473576	0.616284
1.28343	0.882703	0.523647	1.04911
0.609205	0.716978	0.400998	0.869545
0.798298	0.363493	0.758734	2.10429
1.60214	0.724471	1.31798	0.527899
0.914888	0.679086	1.80667	1.76337
1.11858	0.737987	0.819794	0.772889
1.23257	0.940609	0.974905	1.58
1.35347	1.18646	0.524252	2.21
0.824543	0.525465	1.00231	1.78
	0.577009	1.35943	2.56
		1.18345	2.43
		1.41716	1.78
		0.538867	1.18646
		0.743807	1.52802
		0.59	1.13813
		0.883723	1.53865
		1.16608	1.59844
		0.865537	1.62638
		1.59291
		1.10701
		1.38671

## Sheet: Figure 5E
Veh	NE	Veh	NE
1.1356	0.61007	0.437267	0.652776
0.870795	0.69454	0.583116	0.816392
1.10215	0.4575	0.434585	0.729265
0.891448	0.540621	0.626248	0.52289
1.1453	0.7417	0.935117	0.859585
1.0058	0.8089	0.877283	0.578868
1.0523	0.7372	1.14704	1.21887
0.8234	0.58	0.76823	1.43325
0.9731	0.5759		0.573832
1.2741	0.4816		2.16837
1.0538	0.3532
0.6721
