# Supplementary material for: CB1R regulates soluble leptin receptor levels via CHOP, contributing to hepatic leptin resistance
Source: eLife journal article supplement (doi:10.7554/elife.60771), 2020-11-19
Supplement: supp [file elife-60771-supp-v1.zip › elife_poa_e60771_Figure_6_figure_supplement_1_source_data_1.xlsx]

## Sheet: Figure 6-Figure Supplement 1C
STD	HFD	HFD +JD5037	STD	HFD	HFD +JD5037
1.24866	2.03672	1.73949	0.915829	0.764849	0.852374
0.751339	0.999088	0.700396	0.991276	0.564132	0.598554
0.92385	1.41416	1.34971	0.858793	0.584105	0.739682
0.895316	1.38786	0.52015	0.99381	1.05832	0.96401
1.17722	1.46779	0.896439	1.03318	1.16978
1.05643	1.72489	0.889129	1.20711	0.95516
0.947186	1.63681	1.09265
	1.15358	1.25333
		0.775726

## Sheet: Figure 6-Figure Supplement 1D
STD	HFD	HFD +JD5037	STD	HFD	HFD +JD5037
1.37	1.83	0.64	0.46	0.18	0.11
0.76	3.43	0.7	0.15	0.48	0.15
0.92	2.22	0.73	0.35	0.36	0.53
0.81	1.85	0.92	0.28	0.26	1.16
1.3	2.73	1.13	0.42	0.31	1.21
0.37	3.06	0.76	0.51	0.42	1.16
1.26	2.19	2.13	0.17	0.14	0.53
0.98	1.11	1.3	0.24	0.12	0.23
1.4	1.43	2.67	0.15	0.12	1.11
0.64		3.29	0.67	0.95	0.96
0.83		1.41	0.51	1.32	0.06
1.34			1.16	0.21
			1.19	0.13
			0.39	0.34
			0.71	0.93
				0.24
				0.82
				0.55
				0.5
				0.58

## Sheet: Figure 6-Figure Supplement 1E
Veh	NE	Veh	NE
1.01	1.22	0.37	0.58
0.96	1.32	0.38	0.4
1.03	1.43	0.58	0.38
1.02042	0.90073	0.16	0.899171
1.14803	1.29161	0.26	0.195693
0.687374	0.808975	0.27	0.385998
0.982253	1.29161	0.25	0.40239
0.999423	1.42323	0.23	0.286512
1.26503	1.4183	0.18	0.561231
0.889356	1.32945	0.68976	0.666264
0.702628	1.27089	0.57601	0.515544
1.05032	1.15736	0.580017	0.596323
0.908044	2.81051	0.511983	0.619496
0.959818		0.421664	0.602556
		0.729089	0.596323
		0.057745	0.149771
		0.061462	0.204594
		0.06385	0.101943
		0.126818	0.125942
		0.079983	0.128144
		0.139742	0.123779
