# Supplementary material for: CB1R regulates soluble leptin receptor levels via CHOP, contributing to hepatic leptin resistance
Source: eLife journal article supplement (doi:10.7554/elife.60771), 2020-11-19
Supplement: supp [file elife-60771-supp-v1.zip › elife_poa_e60771_Figure_6_figure_supplement_2_source_data_1.xlsx]

## Sheet: Figure 6 - Figure Supplement 2A
STD	HFD	HFD +JD5037	STD	HFD
0.93	0.52	1.54114	1.1	0.87
1	0.8	0.808881	0.84	0.66
1.27	0.49	1.10496	1.1	0.81
0.84	0.5	1.32317	0.98	0.7
0.944965	0.57		1.06585	0.473685
0.919125	0.48		1.19914	0.551717
1.15135	0.714002		0.883927	0.647073
0.988971	0.657016		0.921464	0.927874
1.06733	0.588046		0.960595	0.308213
1.14393	0.643495			0.518351
1.05995	0.526316
0.781328

## Sheet: Figure 6 - Figure Supplement 2D
STD	HFD	HFD +JD5037	STD	HFD
1.38152	0.425482	1.59584	0.821061	0.28495
1.55387	0.162684	4.12736	1.38591	0.60569
0.848324	0.062303	1.39067	0.78876	1.98214
0.475142	0.637466	1.21277	0.880066	1.22632
0.741145	0.030588	0.724824	0.883142	0.265632
			1.24106	1.18058

## Sheet: Figure 6 - Figure Supplement 2E
STD	HFD
1.15189	0.533663
0.820173	0.372161
0.948684	0.407254
0.860949	0.49107
1.29594	0.544876
	0.988971
	1.08975
	0.723969
	1.04536
	1.10496

## Sheet: Figure 6 - Figure Supplement 2G
STD	HFD
1.36907	0.097004
0.630931	0.115521
0.537626	0.001698
1.14024	0.001078
1.15326	0.112348
1.16887	0.1453
	0.208904
	0.104174
	0.343454
	0.334132
