# Supplementary material for: CB1R regulates soluble leptin receptor levels via CHOP, contributing to hepatic leptin resistance
Source: eLife journal article supplement (doi:10.7554/elife.60771), 2020-11-19
Supplement: supp [file elife-60771-supp-v1.zip › elife_poa_e60771_Figure_6_source_data_1.xlsx]

## Sheet: Figure 6A
Veh	TM	Veh	TM
1.1	14.45	0	0
0.91	14.9
1.02	12.62
1.01	29.58
0.97	35.67
0.29	40.13
1.16	27.92
0.91	49.12
1.33	45.2
2.88	61.32
0.85	74.46
1.34723	40.9275
0.787308	22.5491
0.942785	20.393

## Sheet: Figure 6D
Veh	TM	Veh	TM
0.663323	2.66089	0.058964	0.86664
1	2.30137	1.11428	0.559663
1.4321	2.62645	0.315193	0.402169

## Sheet: Figure 6E
Veh	TM	Veh	TM
1.39	0.95	0.462225	1.73107
1.77	2.19	1.39636	1.36289
0.41	2.71	1.04006	1.2283
0.819794	5.5149	2.16845	1.46578
1.04851	0.90021	0.960373	0.676737
1.16339	2.11893	0.514651	1.03288
1.0693	0.813191	0.535268	1.85746
1.47087	0.813191	1.15936	2.20127
0.865537	0.753493	1.09682
0.740549	1.30285
1.08423	4.03248
0.914888	1.0293
1.0558	1.65099
0.854607	1.85104
1.10829	0.791869
0.914888	1.92741
1.11858	1.87471
1.23257	1.38191
1.35347	3.13109
0.710382	2.8912
0.824543	2.94173

## Sheet: Figure 6G
UT	mCHOP (9E10)
1	2.02621
1.27767	1.62279
1.03043	1.58371

## Sheet: Figure 6H
Veh	TM	NE	Veh	TM	NE
0.6822	1.9624	0.9145	1.0078	0.6758	1.4597
1.1312	1.8558	0.7362	1.02	1.4562	0.8905
1.1112	1.9546	0.8828	0.7994	1.3551	0.7954
0.8488	1.4559	0.8247	0.9338	1.0563	1.2593
1.3406	1.6635	0.8569	1.4179	0.8205	0.5638
0.7646	1.6416	0.3213	0.95	0.6281	0.974
0.9669	1.7346	0.768	0.2319	0.9455	0.5376
1.1546	1.5413	0.6539	0.6404	1.5422	0.8158
0.7766	1.68	0.8478	1.1784	0.5688	1.0088
0.8479	1.5699	0.6099	0.6468	1.3972	1.0692
1.1239	0.8896	1.0234	1.4916	0.6939	0.8279
1.0666	0.9355	0.8662	1.153	1.3717	1.2115
0.9706	1.4666	1.173	1.2644	0.8633	0.9558
1.2851	1.1908	0.7868	0.8409	0.5284	1.5204
0.8996			0.7844	0.745
1.0297				0.5284

## Sheet: Figure 6I
GAPDH	GADD34	Ob-R P.	GAPDH	GADD34	Ob-R P.
1	2.44663	1.56498	1	0.995117	0.681009
1	2.54099	2.05591	1	1.112	0.473732
1	2.3436		1	0.832579
1	2.37487		1	0.971861
	2.42632
	1.91476
	1.45759
