# Supplementary figures and images for: CB1R regulates soluble leptin receptor levels via CHOP, contributing to hepatic leptin resistance
Source: eLife journal article supplement (doi:10.7554/elife.60771), 2020-11-19

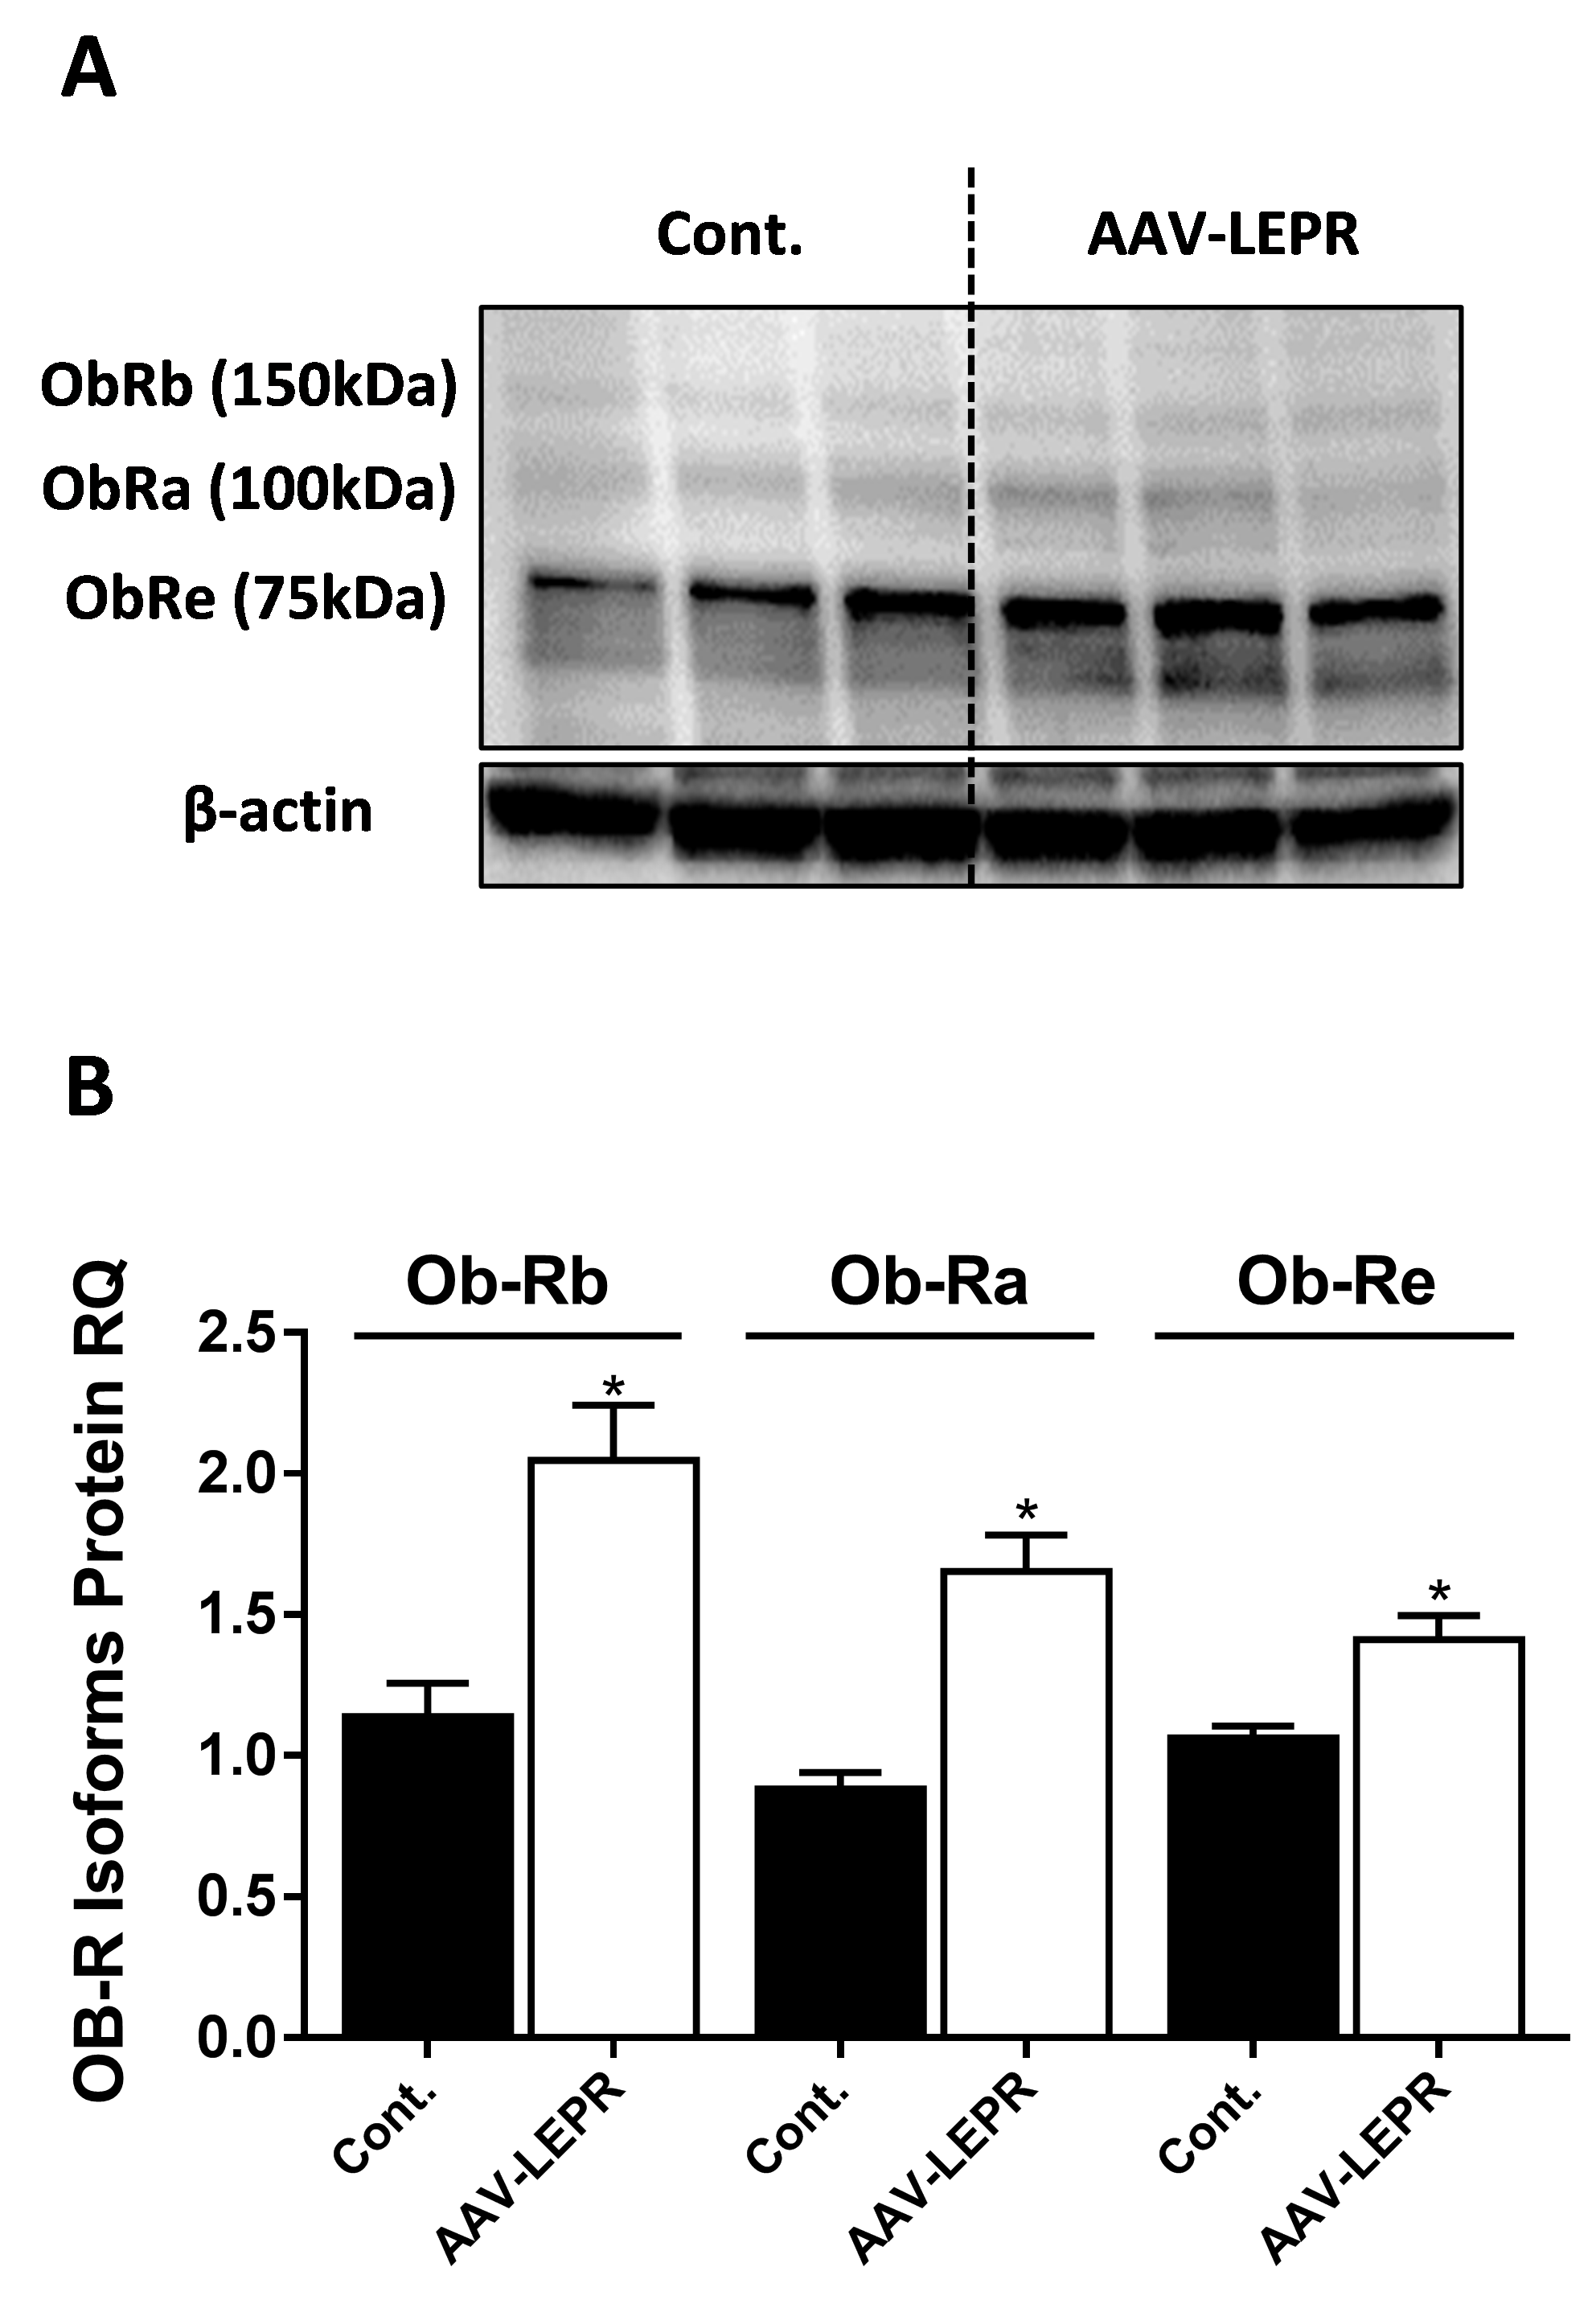

Supplement: supp [file elife-60771-supp-v1.zip › elife_poa_e60771_Figure_1_figure_supplement_1.tif]

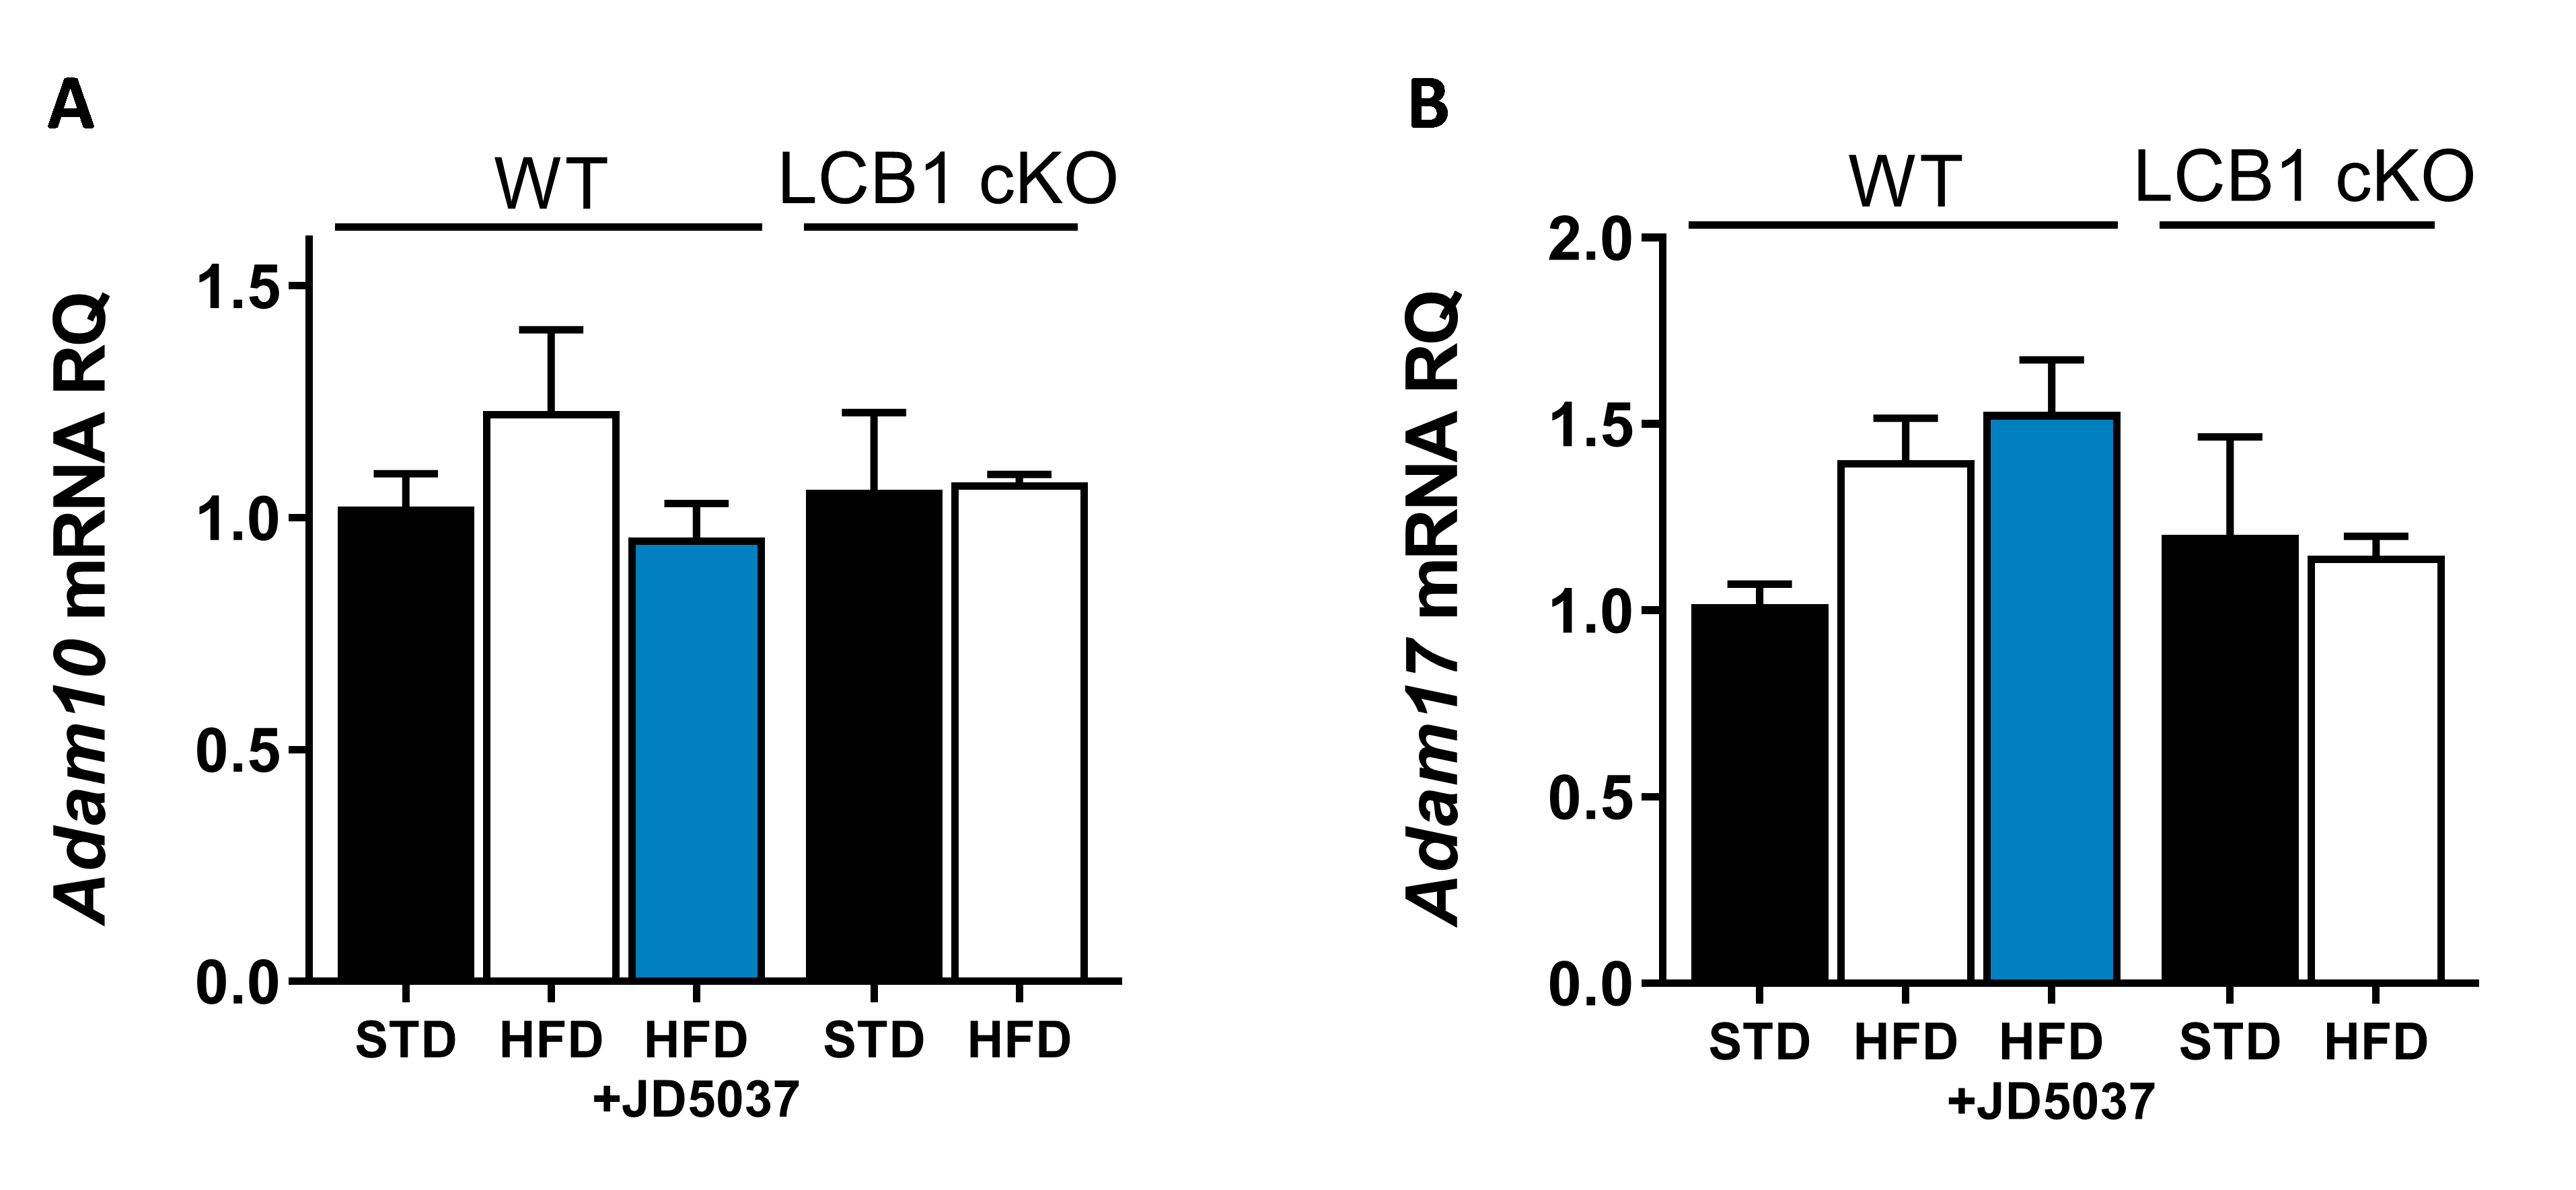

Supplement: supp [file elife-60771-supp-v1.zip › elife_poa_e60771_Figure_2_figure_supplement_1.tif]

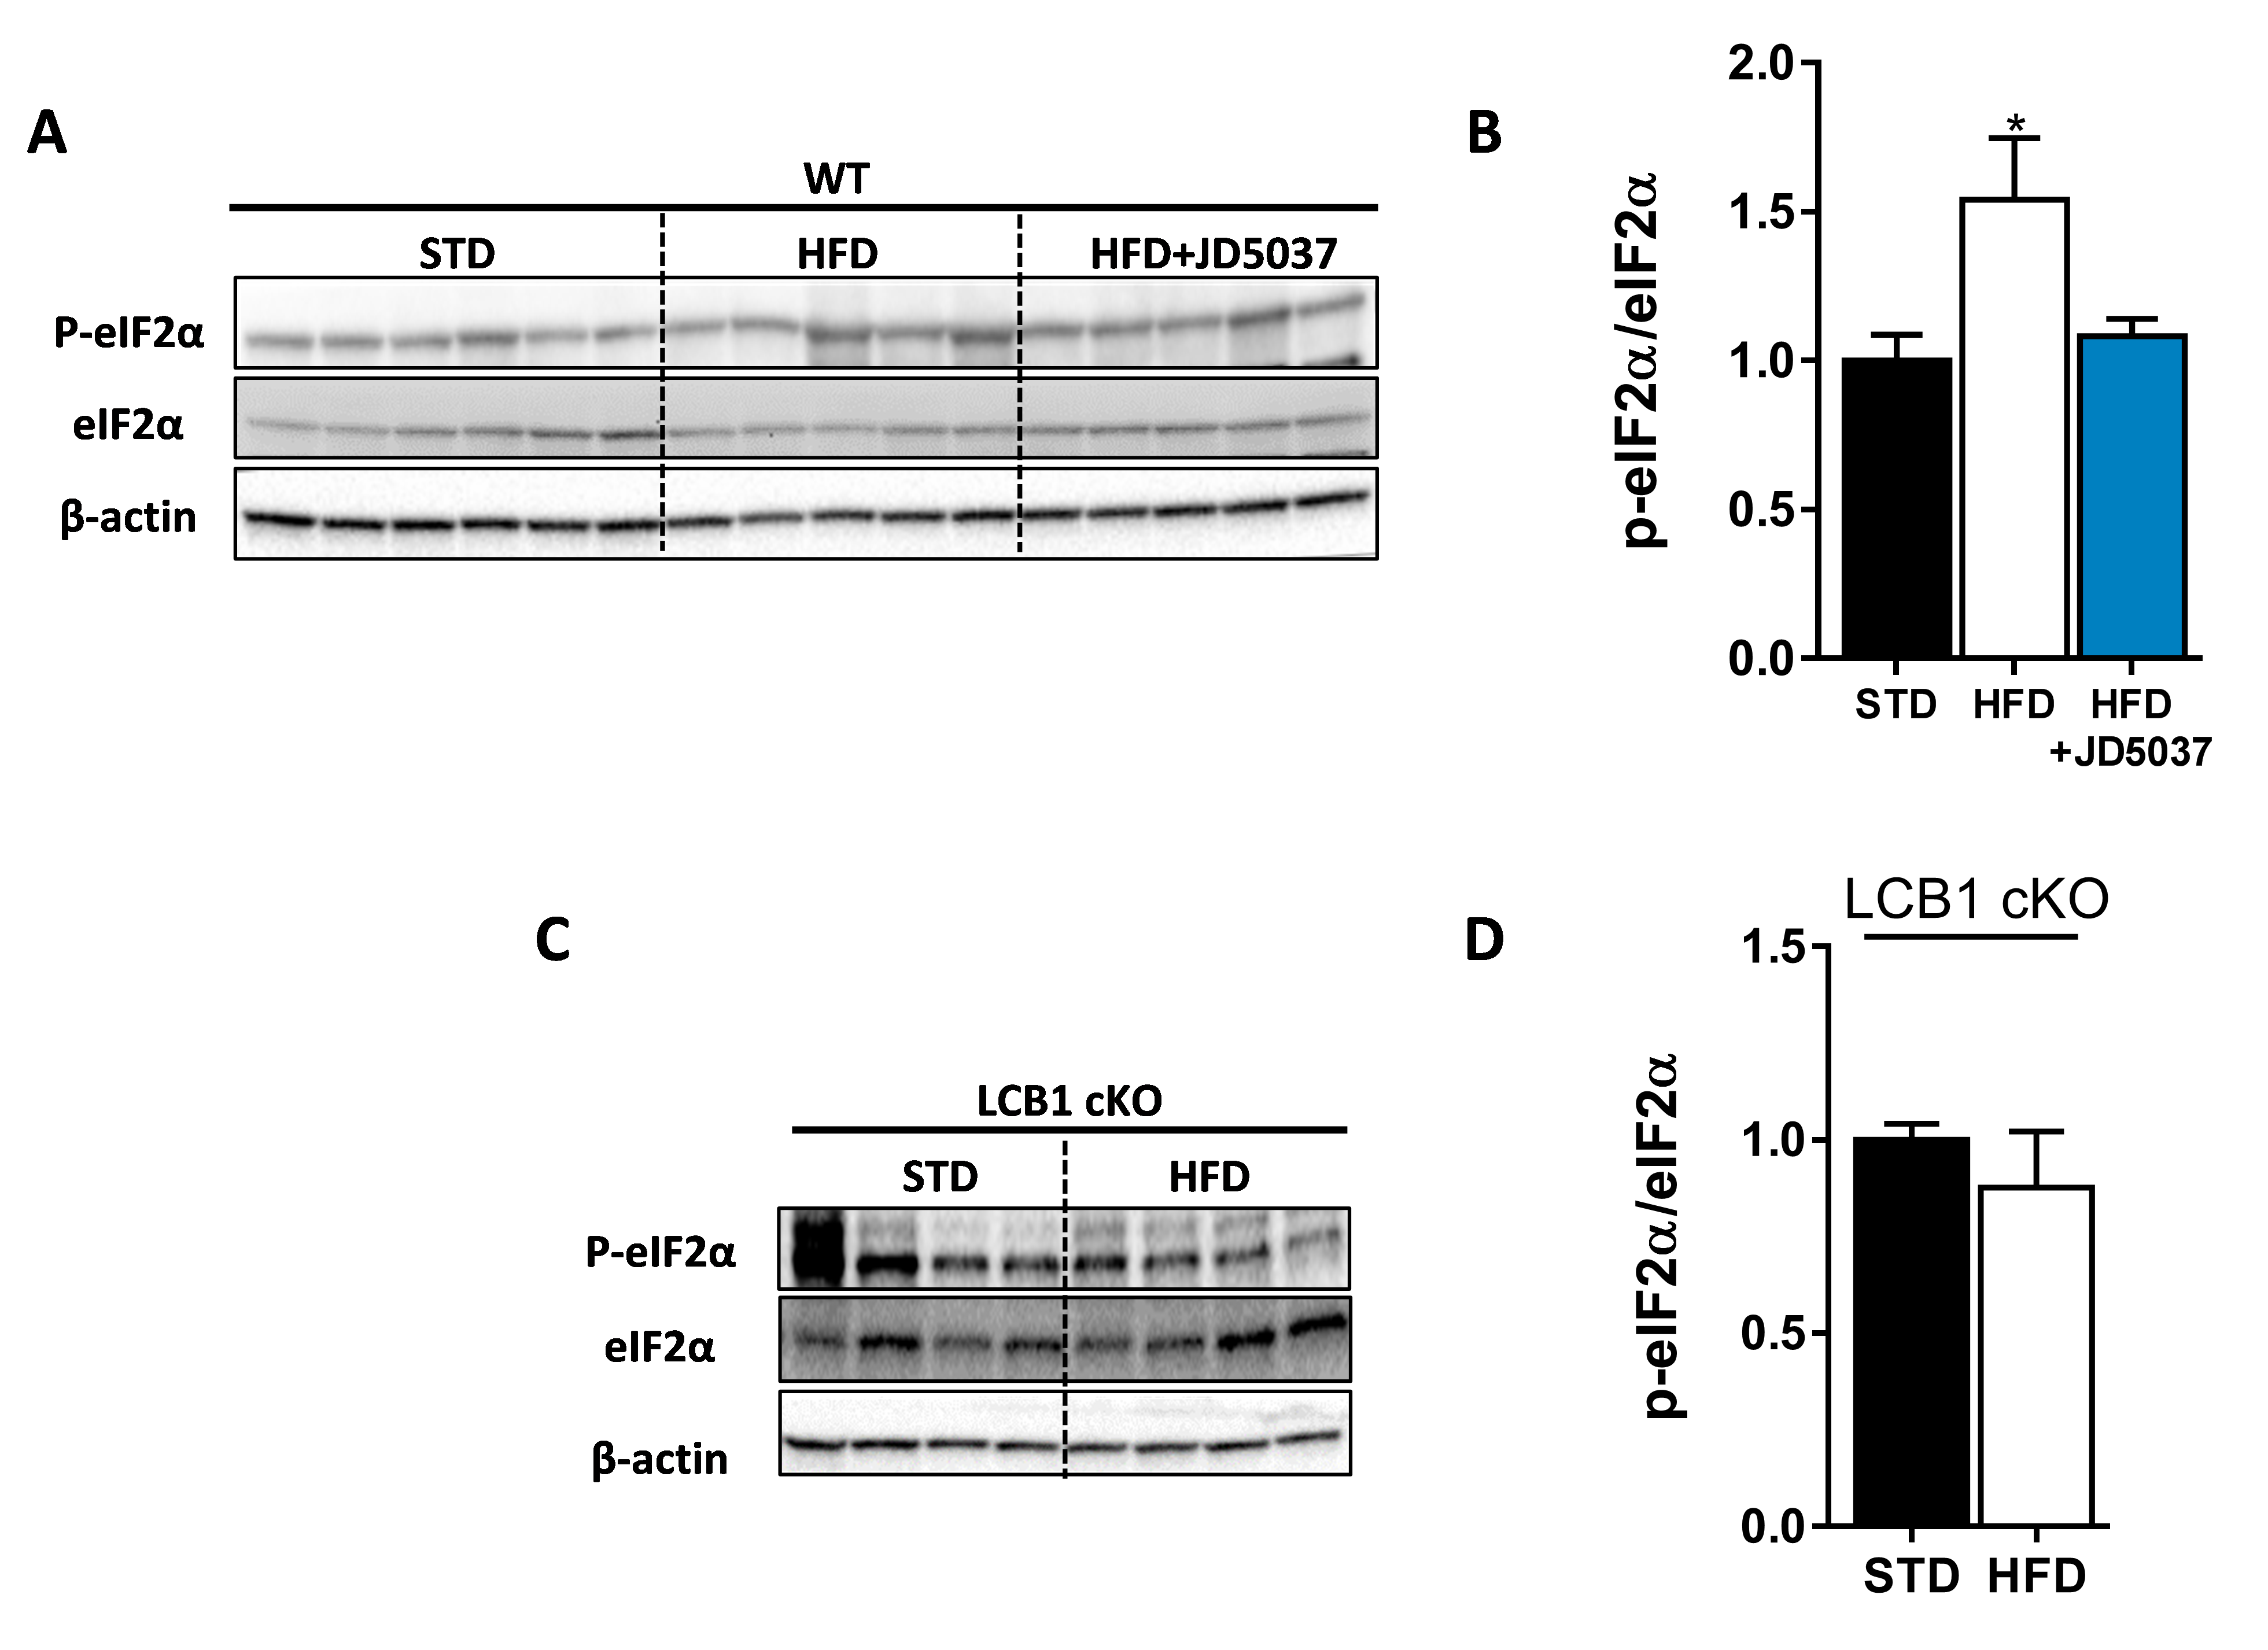

Supplement: supp [file elife-60771-supp-v1.zip › elife_poa_e60771_Figure_3_figure_supplement_1.tif]

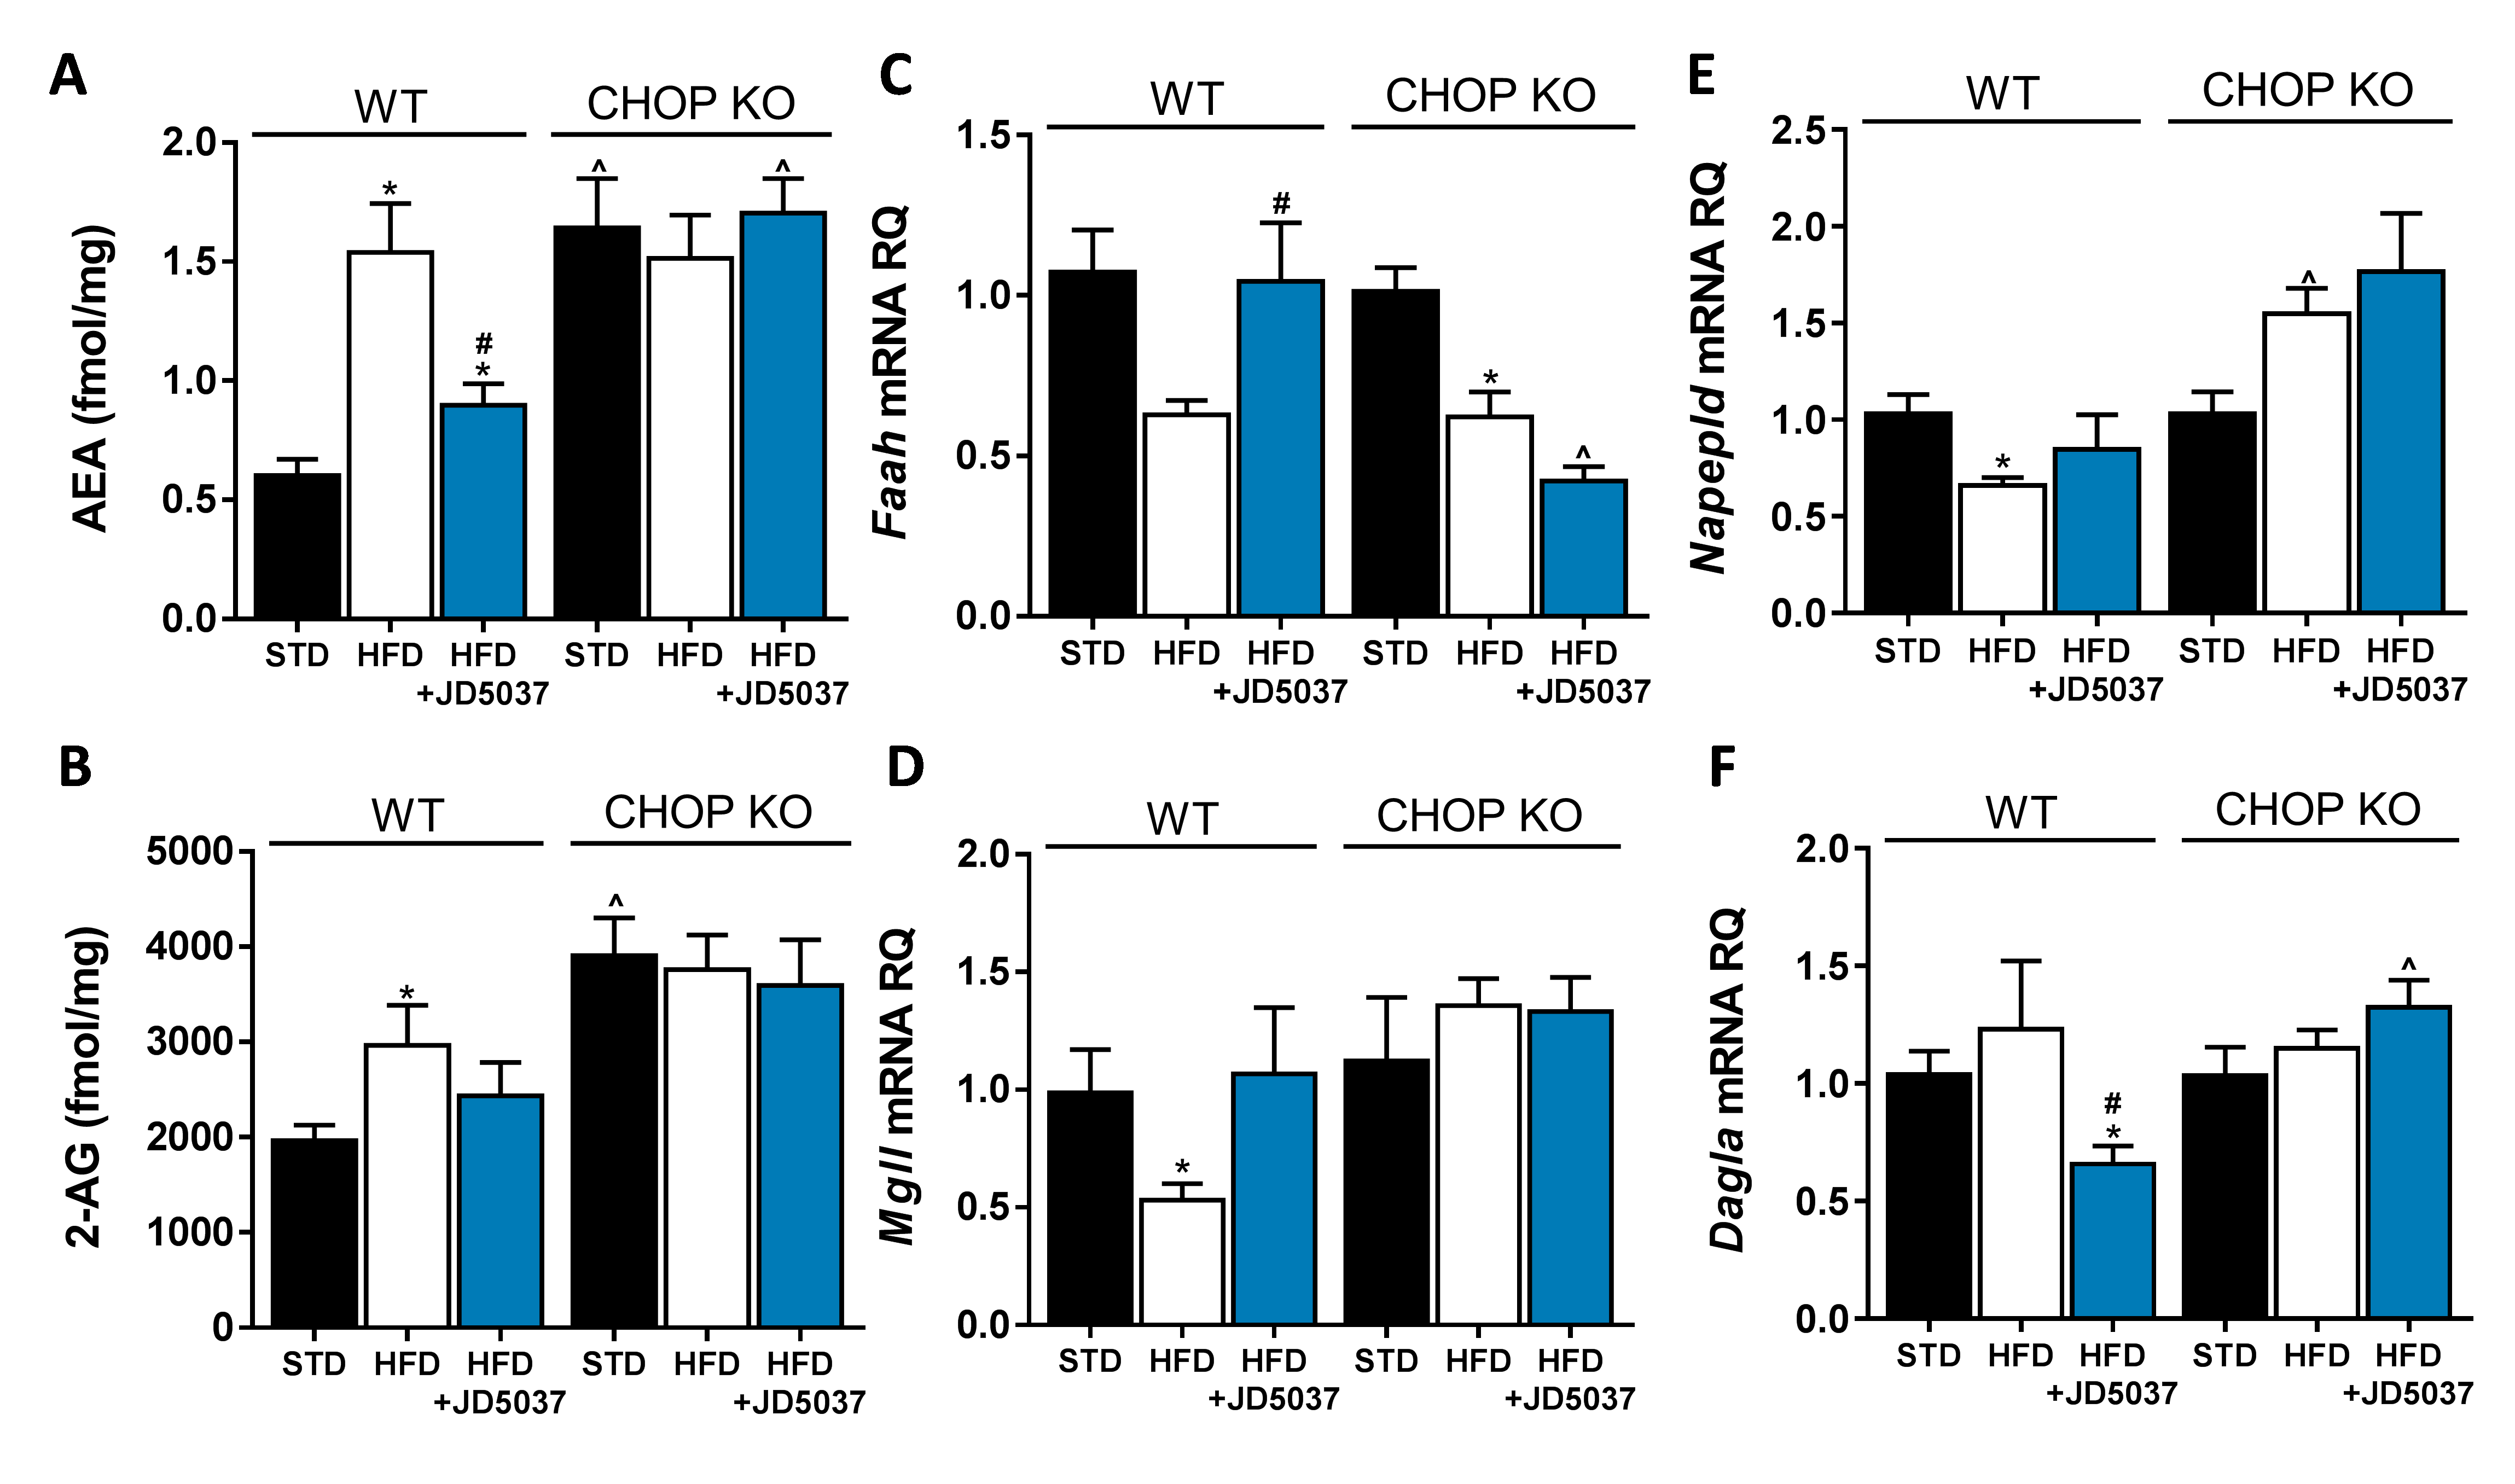

Supplement: supp [file elife-60771-supp-v1.zip › elife_poa_e60771_Figure_3_figure_supplement_2.tif]

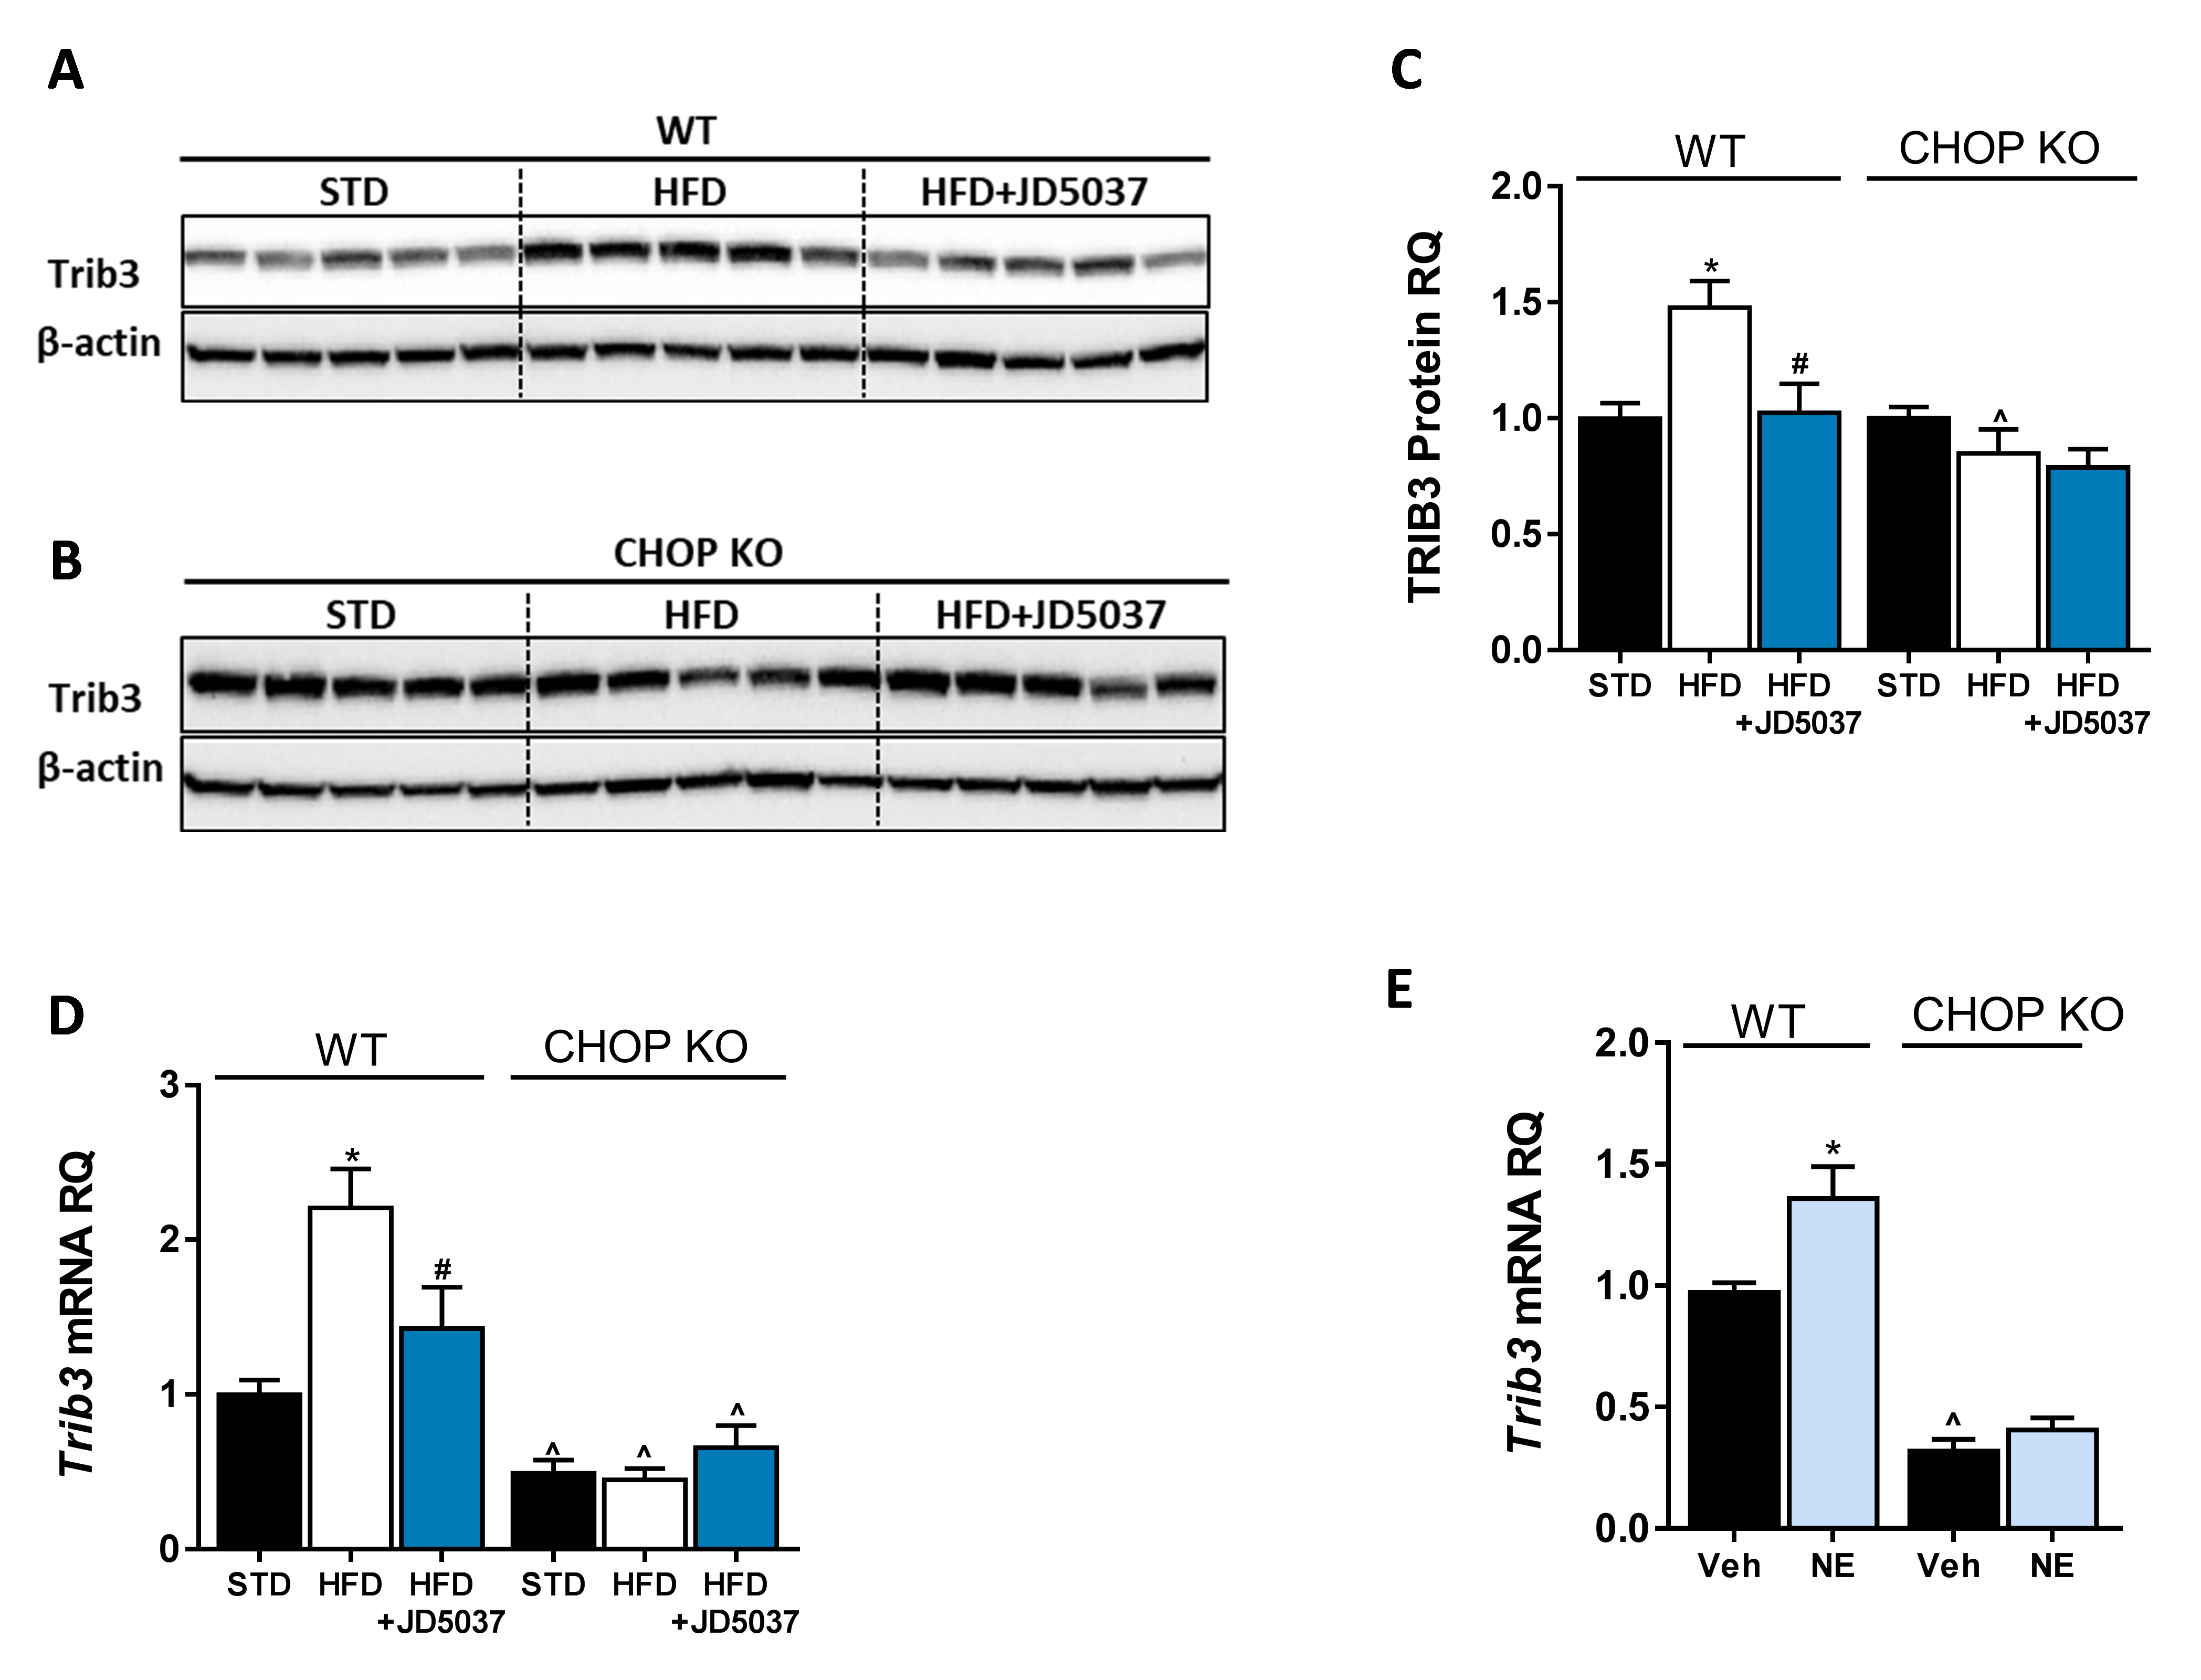

Supplement: supp [file elife-60771-supp-v1.zip › elife_poa_e60771_Figure_6_figure_supplement_1.tif]

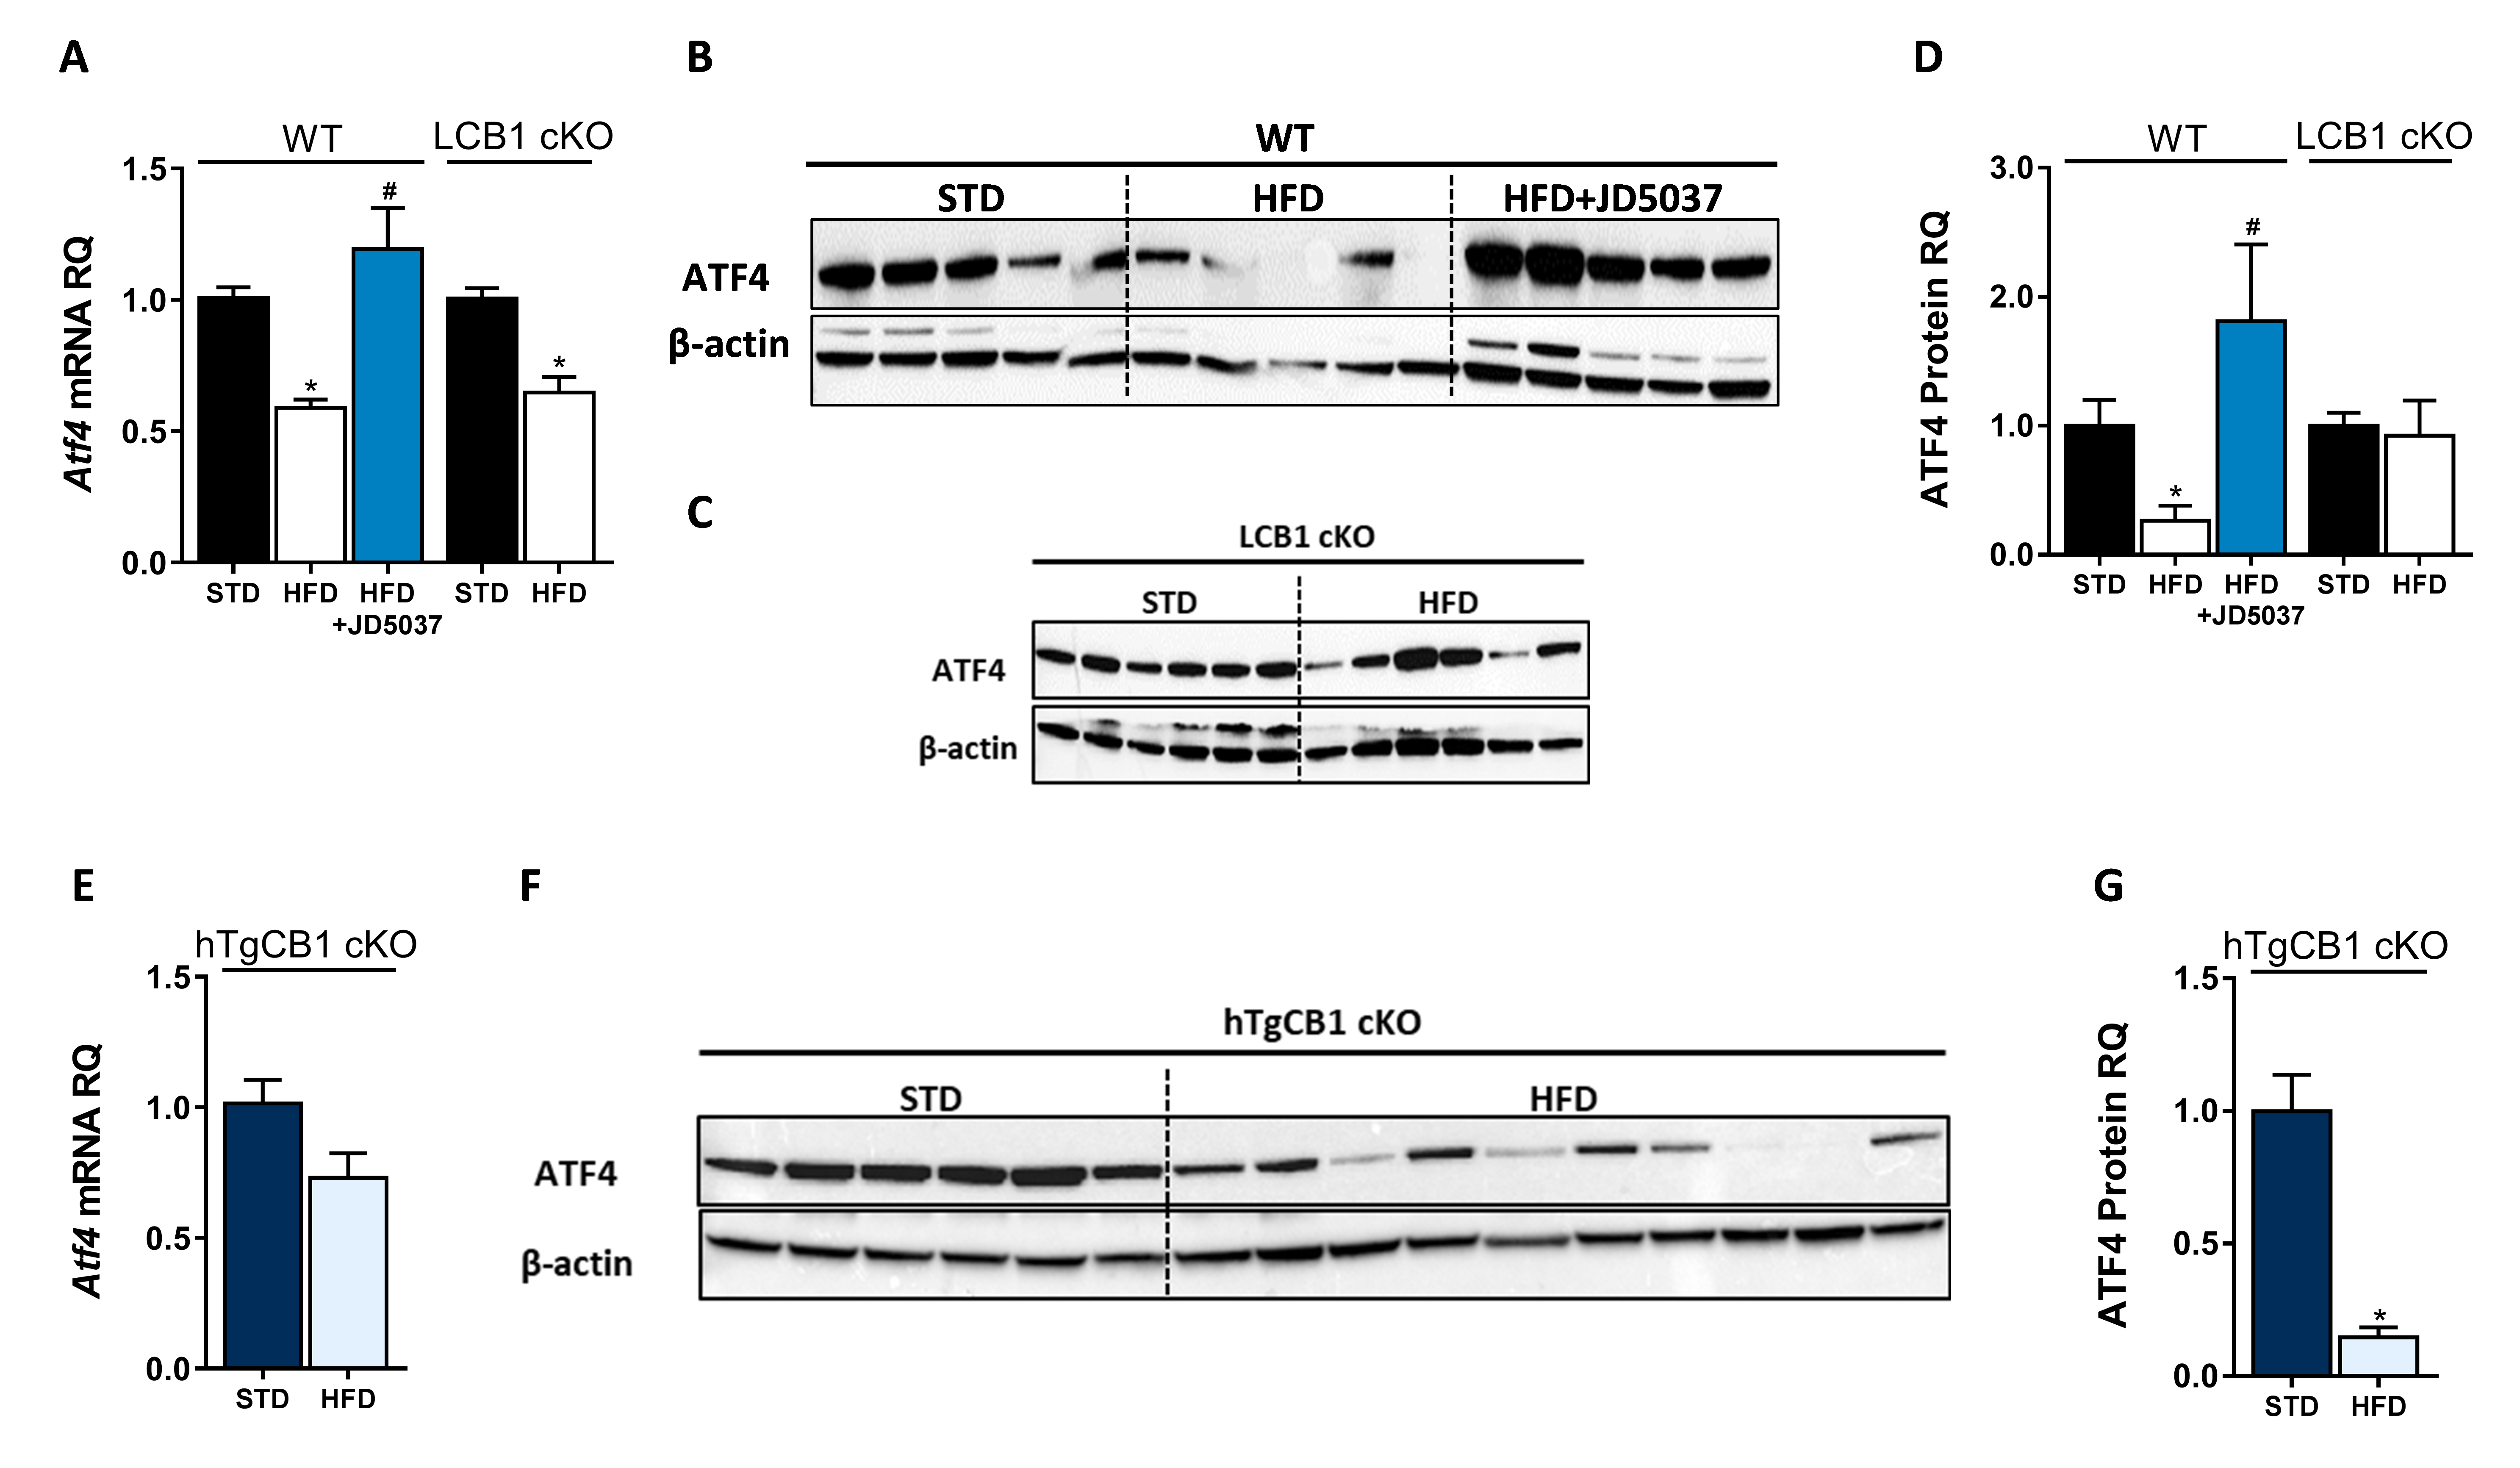

Supplement: supp [file elife-60771-supp-v1.zip › elife_poa_e60771_Figure_6_figure_supplement_2.tif]
